# Supplementary material
Source: PubMed Central journal article supplement (PMC4333618)
Supplement: Supp_Fig1.pdf [file Supp_Fig1.pdf]

## Supplementary Data

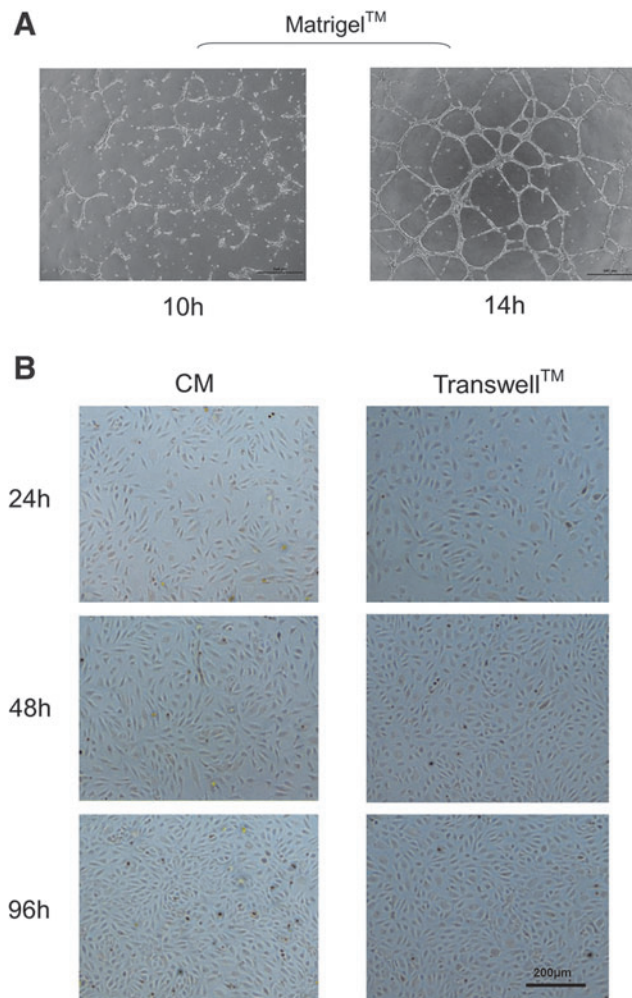

**SUPPLEMENTARY FIG. S1.** (A) The innate angiogenic potential of HUVEC used in experiments were tested via Matrigel™ tube formation assay. HUVEC formed the tube structures within 10 to 14 h on Matrigel. (B) Indirect coculture using Transwell™ or HMSC-conditioned medium (CM) did not induce the formation of cell aggregation structures. Representative images for 24, 48, and 96 h of HUVEC culture in CM and Transwell were indicated. In Transwell experiment, HMSC were cultured in the inserts and HUVEC were cultured in the plate bottom. HMSC, human mesenchymal stem cell; HUVEC, human umbilical vein endothelial cell.
