# Supplementary material
Source: PubMed Central journal article supplement (PMC4333618)
Supplement: Supp_Fig3.pdf [file Supp_Fig3.pdf]

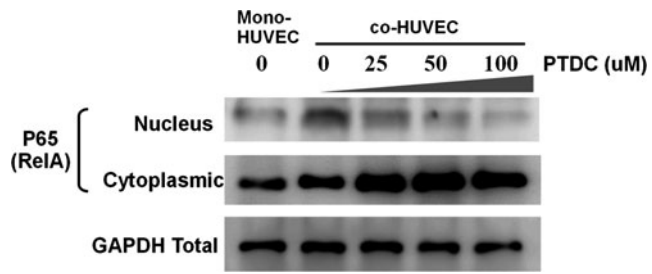

**SUPPLEMENTARY FIG. S3.** PTDC effectively blocked nucleus translocation of p65 (RelA) in co-HUVEC. Western blot of p65 nucleus translocation in co-HUVECs after treatment of indicated dose of PTDC. Mono-HUVEC group was used as a blank control group. GAPDH was used as a loading control for each group. GAPDH, glyceraldehyde 3-phosphate dehydrogenase.
