# Supplementary material
Source: PubMed Central journal article supplement (PMC4333618)
Supplement: Supp_Fig4.pdf [file Supp_Fig4.pdf]

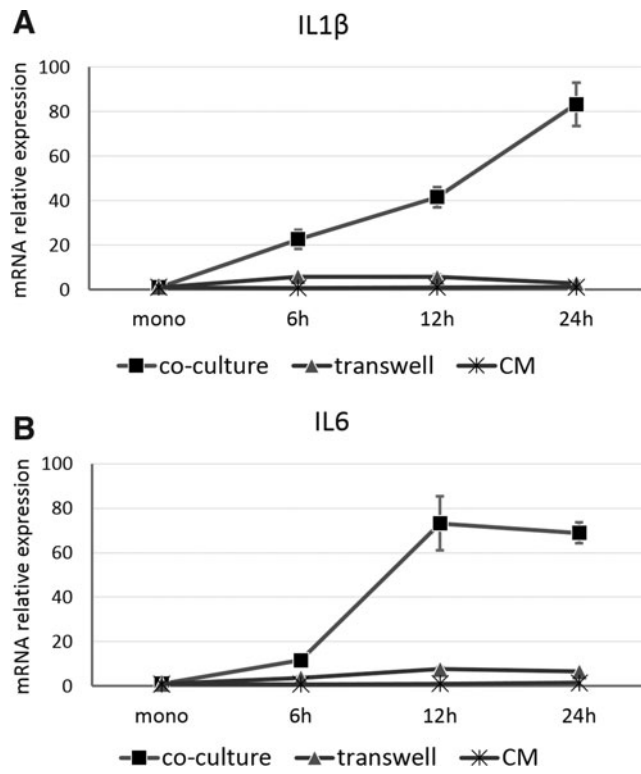

**SUPPLEMENTARY FIG. S4.** Effects of culture models on IL1 $\beta$  (A) and IL6 (B) mRNA expression induction. HMSC cultured in HUVEC-conditioned medium. IL, interleukin.
