# Supplementary material
Source: PubMed Central journal article supplement (PMC4333618)
Supplement: Supp_Fig5.pdf [file Supp_Fig5.pdf]

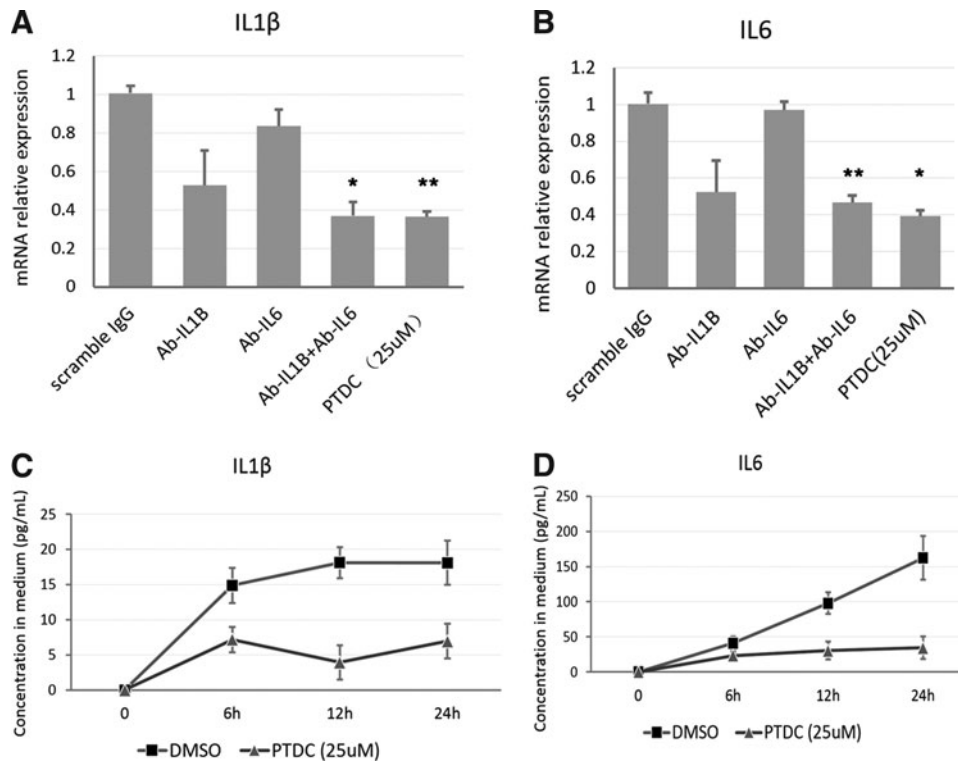

**SUPPLEMENTARY FIG. S5.** Potential NF- $\kappa$ B regulatory feedback mechanism in HMSCs on the expression and secretion of IL1 $\beta$  and IL6. Effects of neutralizing of IL1 $\beta$ , IL6, and NF- $\kappa$ B blocking (PTDC) on the mRNA expression level of IL1 $\beta$  (A) and IL6 (B). Effects of NF- $\kappa$ B blocking (PTDC) on the secretion of IL1 $\beta$  (C) and IL6 (D) in culture medium.
