# Supplementary material
Source: PubMed Central journal article supplement (PMC4333618)
Supplement: Supp_Fig6.pdf [file Supp_Fig6.pdf]

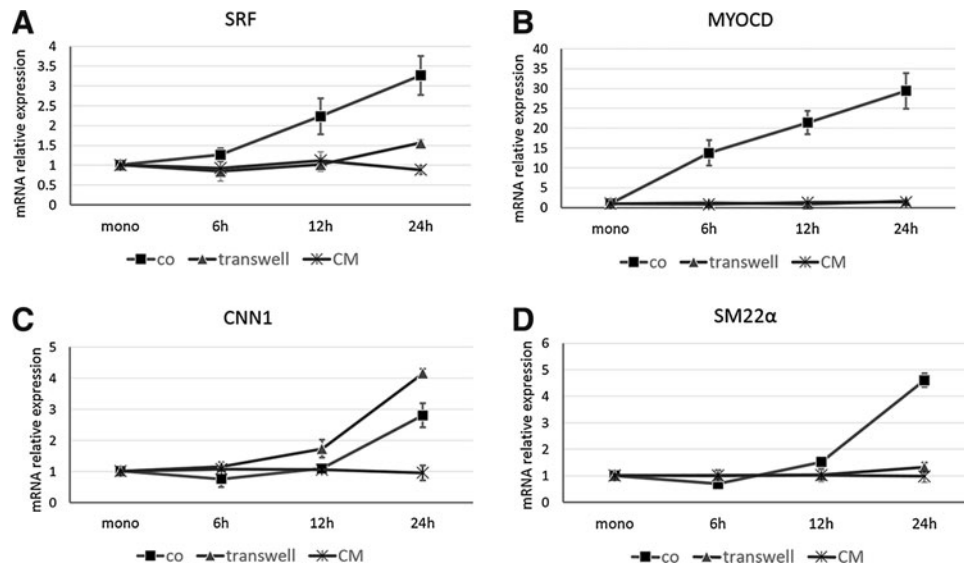

**SUPPLEMENTARY FIG. S6.** Effects of culture models on SRF (A), MYOCD (B), CNN1 (C), SM22a (D) and mRNA expression induction.
