# Supplementary material
Source: PubMed Central journal article supplement (PMC4333618)
Supplement: Supp_Fig7.pdf [file Supp_Fig7.pdf]

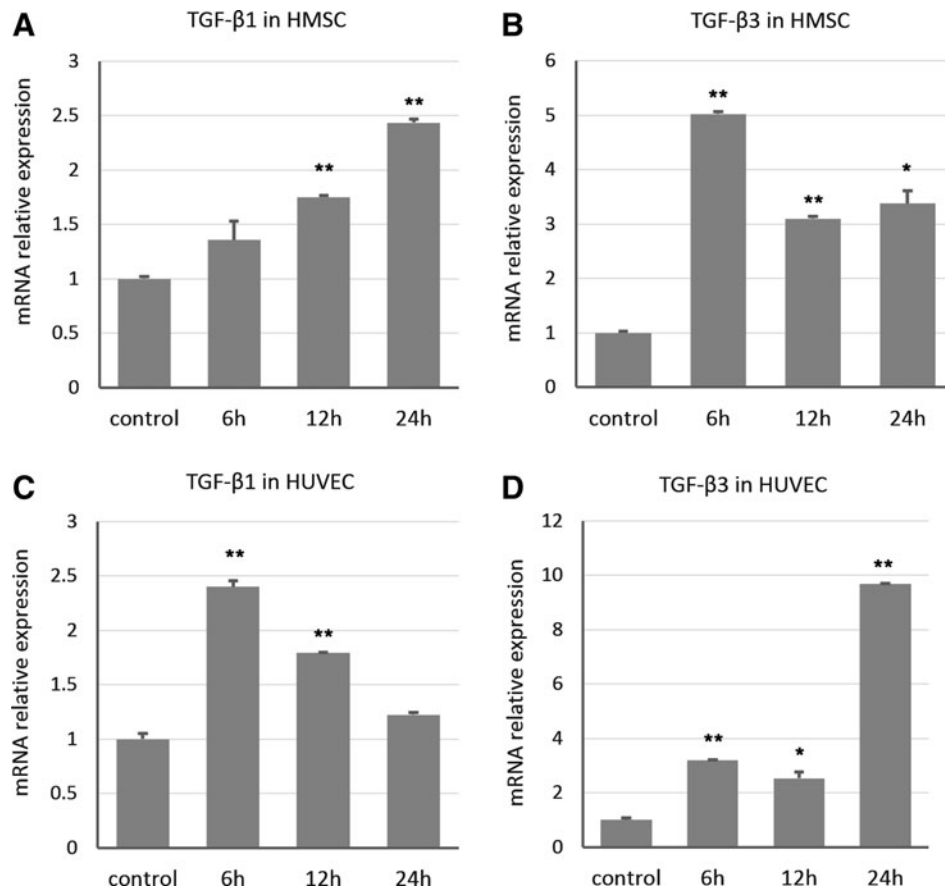

**SUPPLEMENTARY FIG. S7.** TGF-β1 and TGF-β3 were induced to expression in HMSC and HUVEC upon coculture. Relative mRNA expressions of TGF-β1 and TGF-β3 in HMSC (**A**, **B**) and HUVEC (**C**, **D**) after coculture within 24 h.
