# Supplementary material
Source: PubMed Central journal article supplement (PMC4333618)

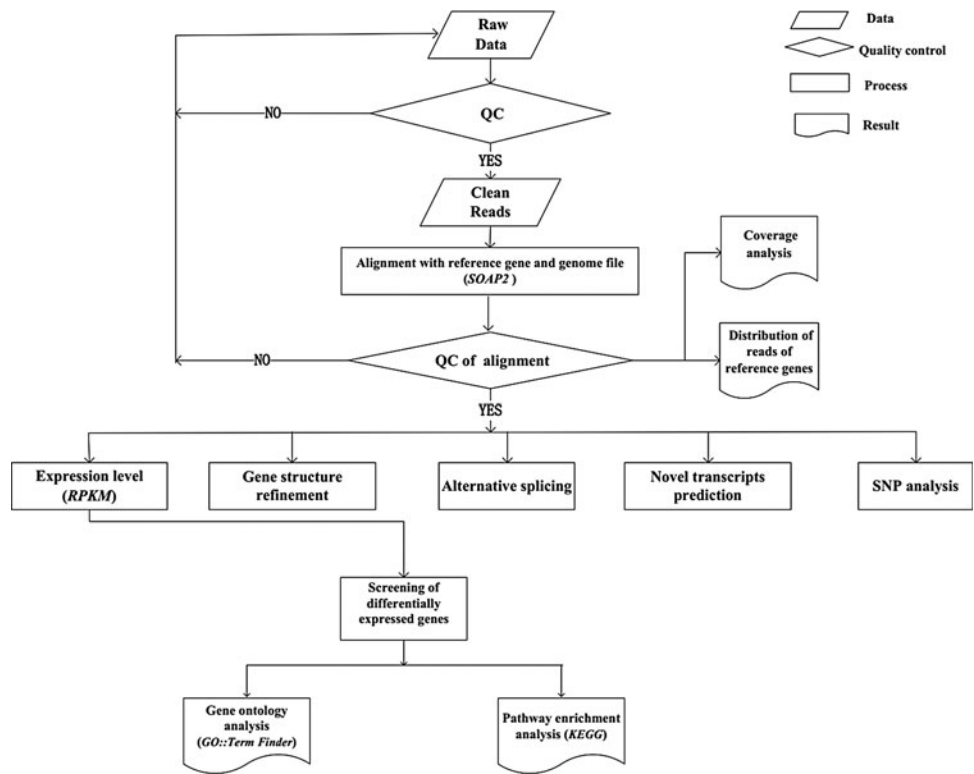

**SUPPLEMENTARY FIG. S2.** Bioinformatics analysis pipeline for RNA-seq results. QC, quality control.

Supplement: Supp_Fig2.pdf [file Supp_Fig2.pdf]
